# Supplementary material for: From Bench to Bedside: Clinical and Biomedical Investigations on Hepatitis C Virus (HCV) Genotypes and Risk Factors for Albuminuria
Source: MDPI journal article supplement (doi:10.3390/bioengineering9100509), 2022-09-27
Supplement: s1 [file s1]

**Supplementary Table S1.** Liver function tests and lipid profiles in the distribution of HCV genotypes

|                         | HCV-RNA<br>Positive | HCV-RNA<br>Negative | <i>p</i> -value | Genotype 1a     | Genotype 1b      | Genotype 2       | Genotype 3      | <i>p</i> -value |
|-------------------------|---------------------|---------------------|-----------------|-----------------|------------------|------------------|-----------------|-----------------|
| AST (U/L)               | 61.49 (2.782)       | 27.41 (1.508)       | <0.001***       | 60.18 (2.974)   | 67.07 (10.192)   | 48.30 (5.462)    | 70.41 (8.509)   | 0.601           |
| ALT (U/L)               | 64.54 (4.567)       | 24.60 (1.499)       | <0.001***       | 60.41 (2.971)   | 76.23 (21.886)   | 54.60 (8.390)    | 78.41 (11.404)  | 0.811           |
| Total bilirubin (mg/dL) | 0.7312 (0.02)       | 0.6454 (0.025)      | 0.991           | 0.7172 (0.0267) | 0.7459 (0.03881) | 0.7100 (0.05700) | 0.7852 (0.0680) | 0.797           |
| LDL (mg/dL)             | 94.75 (5.461)       | 114 (9.809)         | 0.320           | 90.95 (7.368)   | 101.67 (13.745)  | 101.67 (6.766)   | 93.67 (1.764)   | 0.857           |
| HDL (mg/dL)             | 56.03 (2.319)       | 49.66 (3.186)       | 0.386           | 56.85 (3.407)   | 55.29 (3.395)    | 50.29 (6.301)    | 50.40 (3.027)   | 0.317           |
| Cholesterol (mg/dL)     | 175.9 (2.144)       | 187.47 (2.848)      | 0.255           | 175.39 (2.745)  | 178.48 (5.249)   | 192.00 (6.805)   | 160.33 (6.518)  | 0.086           |
| Triglyceride (mg/dL)    | 135.36 (5.331)      | 157.87 (10.6)       | 0.039           | 138.55 (7.115)  | 146.39 (13.729)  | 134.53 (15.281)  | 106.37 (11.824) | 0.544           |

\*\*\* *p*-value <0.001.

Abbreviations: AST: Aspartate Aminotransferase; ALT: Alanine Aminotransferase; HDL: high-density lipoprotein; LDL: low-density lipoprotein.
